# Supplementary material for: Perceptions of Medical Students Regarding Career Counseling in Korea: A Qualitative Study
Source: Int J Environ Res Public Health. 2020 May 16;17(10):3486. doi: 10.3390/ijerph17103486 (PMC7277443; doi:10.3390/ijerph17103486)
Supplement: Supplementary file 1 [file ijerph-17-03486-s001.pdf]

## *Supplementary Information*

# Perceptions of Medical Students Regarding Career Counseling in Korea: A Qualitative Study

Minsu Ock <sup>1,2,†,\*</sup>, Young-Joo Han <sup>3,†,\*</sup>, Eun Young Choi <sup>1,4</sup>, Jeehee Pyo <sup>1</sup> and Won Lee <sup>5</sup>

<sup>1</sup> Department of Preventive Medicine, Ulsan University Hospital, University of Ulsan College of Medicine, Ulsan 44033, Republic of Korea; eesther0517@naver.com (J.P.)

<sup>2</sup> Department of Preventive Medicine, University of Ulsan College of Medicine, Seoul 05505, Republic of Korea

<sup>3</sup> Korea Counseling Graduate University, Seoul 06722, Republic of Korea

<sup>4</sup> Department of Nursing, Graduate School of Chung-Ang University, Seoul 06974, Republic of Korea; 11351@naver.com (E.Y.C);

<sup>5</sup> Department of Nursing, Chung-Ang University, Seoul 06974, Republic of Korea; oness38@daum.net (W.L.).

<sup>†</sup> These authors contributed equally to this work.

\* correspondence: ohohoms@naver.com ( M.O.) ; hanyj@kcggu.ac.kr (Y.J.H.)

## **FGD guidelines for the career counseling of medical students**

### Ice-breaking(5-minute)

- Introduction and purpose explanation of the FGD
- Introduction of the FGD process
  - Recording notification and approval confirmation
  - Inform the FGD proceeding steps and precautions
  - Inform about personal information protection
- Introduction of participants

### Introductory/Overall Questions (20-minute)

1. The motivation of medical school admission
  - 1) “What was your motivation for medical school enrollment?”
  - 2) “Did you experience any challenges after the enrollment?”

## Necessity Recognition of Career Counseling Program (30-minute)

### 2. Necessity recognition of career counseling program

1) "Assuming various challenges you could experience in medical school, what is the most difficult one you have experienced?"

☐ Investigative Question

- Identify the order of priority in previously mentioned challenges

- Identify the necessity status of career counseling

2) "How much have you contemplated on your career path?"

☐ Investigative Question

- Identify whether participants have conducted career exploration

- Identify whether participants have changed their opinions on their career

- "If you have not, what would be the reasons?" Identify the obstacles for career exploration (e.g., busy academic life, lack of information and more)

- "During your career exploration, who has influenced your research the most?"

3) "During your career exploration, what element has influenced your research the most?"

☐ Investigative Question

- Identify elements such as salary, working hour, quality of life, job satisfaction, and more

## Opinions on the Development of Career Counseling Program (30-minute)

### 3. Opinions on the development of the career counseling program

1) "If a career counseling program is developed, would you like to participate?"

2) "If you were to design the content of a career counseling program, what would be the essential component for the program?"

3) "What form a career counseling program should have?"

4) "What is your thought on covering self-efficacy in a career counseling program?"

5) "Do you expect that people with a career counseling experience to choose their major well or to have a high job satisfactory?"

#### Other Discussion (5-minute)

- Additional and follow-up questions on the FGD
- Other questions
- Closing the discussion
- Gratitude demonstration on the FGD participation
